# Supplementary material for: Quality of care and prescription patterns among patients with diabetic kidney disease—a large-scale cohort study from Taiwanese clinics
Source: PeerJ journal article supplement (doi:10.7717/peerj.13636), 2022-07-27
Supplement: description_of_raw_data.docx [file description_of_raw_data.docx]

|  | **True** | **False** |
| --- | --- | --- |
| **Gender** | Male | Female |

| **Medical history** | | |
| --- | --- | --- |
|  | **True** | **False** |
| **Hypertension** | Yes | No |
| **Dyslipidemia** |
| **Smoking** |
| **CAD** |
| **CKD** |
| **CVA** |
| **Amputation** |

| **Use of medicine** | | |
| --- | --- | --- |
|  | **True** | **False** |
| **Metformin** | Yes | No |
| **SU** |
| **AGI** |
| **DPP4** |
| **TZD** |
| **SGLT2** |
| **GLP1** |
| **Insulin** |

| **Urine test** | | |
| --- | --- | --- |
|  | **True** | **False** |
| **Proteinuria** | A positive result of urine albumin-creatinine ratio > 30mg/g creatinine | A negative result of urine albumin-creatinine ratio > 30mg/g creatinine |
